# Supplementary material for: Case Report: Giant cell-rich osteosarcoma of the cervical spine in the pediatric age. A rare entity to consider
Source: Frontiers journal article supplement (doi:10.3389/fsurg.2022.1001149), 2022-10-14
Supplement: Table_1.DOCX [file Table_1.DOCX]

| ***Table I.*** *Outline of the cases of Giant Cell-Rich Osteosarcoma published in the literature* | | | | | | | | | | | | |
| --- | --- | --- | --- | --- | --- | --- | --- | --- | --- | --- | --- | --- |
| **Study** | **N** | **Age** | **Sex** | **Location** | **NA ChT** | **Resection** | **Reconstruction** | **ChT** | **RT** | **Local recurrence** | **Metastases** | **Follow-up (months)** |
| ***Barhust 1986 [7]*** | 9 | 41 | F | Femur diaphysis | - | 1ºIntralesional 2º Radical | 1º Curettage; 2ºDisarticulation | - | - | + | + | 36 |
| 13 | F | Tibia diaphysis | - | 1ºIntralesional 2º Radical | 1º Curettage; 2º Amputation | - | + | - | - | 192 |
| 21 | M | Femur diaphysis | - | 1ºIntralesional 2º Radical | 1º Curettage; 2ºDisarticulation | - | + | + | - | 108 |
| 12 | M | Femur diaphysis | - | Radical | Disarticulation | - |  | - | + | 36 |
| 6 | F | Proximal tibia | - | 1ºIntralesional 2º Radical | 1º Curettage; 2º Amputation | + | - | - | - | 84 |
| 16 | F | Femur diaphysis | - | 1ºWide;  2º Radical | 1ºArthroplasty; 2ºDisarticulation | + | - | + | + | 24 |
| 12 | M | Proximal tibia | - | 1ºIntralesional 2º Radical | 1º Curettage; 2º Amputation | - | - | + | + | 24 |
| 20 | M | Distal femur | - | 1ºIntralesional 2º Radical | 1º Curettage; 2º Amputation | + | - | - | - | 24 |
| 8 | M | Femur diaphysis | - | Radical | Amputation | + |  | - | - | 12 |
| ***Sciot 1995 [18]*** | 1 | 26 | M | Distal femur | NR | NR | NR | NR | NR | NR | NR | NR |
| ***Sato 1996 [19]*** | 1 | 19 | M | Distal femur | + | Wide | Reconstruction + Autograft | + | - | - | - | 72 |
| ***Shuhaibar 1998 [20]*** | 1 | 32 | F | Distal femur | - | 1º Wide;  2º Radical | 1º Resection;  2º Amputation | + |  | + | + | NR |
| ***Bertoni 2003 [21]*** | 1 | 19 | M | Femur diaphysis | - | Wide | Arthroplasty + Autograft | NR | NR | + | + | 240 |
| ***Shinozaki 2004 [22]*** | 1 | 17 | M | Distal radius | - | Intralesional | 1º Curettage; 2º Autograft | NR | + | + | + | 41 |
| ***Hong 2005 [23]*** | 1 | 29 | F | Proximal tibia | + | Wide | Arthroplasty | + | - | - | - | 11 |
| ***Nagata 2006 [24]*** | 1 | 32 | M | Distal femur | - | Intralesional | Curettage + cement | - | - | - | - | 20 |
| ***Kinoshita 2006 [25]*** | 1 | 16 | M | Rib | + | Wide | Soft tissue flap | + | - | - | - | 60 |
| ***Fu 2011 [26]*** | 1 | 67 | F | Mandible | - | Wide | Soft tissue flap | + | + | - | - | 12 |
| ***Verma 2011 [27]*** | 1 | 56 | F | Maxilla | - | Wide | Soft tissue flap | + | + | - | - | NR |
| ***Gambaroti 2011 [28]*** | 1 | 29 | M | Distal femur | - | Intralesional | 1º Curettage; 2º Resection | + | - | + | - | 36 |
| ***Imran 2012 [29]*** | 1 | 16 | F | Proximal tibia | NR | NR | NR | NR | NR | NR | NR | NR |
| ***Kinra 2012 [30]*** | 1 | 21 | M | Femur diaphysis | + | NR | NR | NR | NR | NR | NR | NR |
| ***Wang 2013 [6]*** | 9 | 51 | M | Proximal femur | + | Intralesional | Arthroplasty | - | - | + | + | 18 |
| 18 | M | Proximal tibia | - | Radical | Amputation | + | - | - | - | 92 |
| 36 | F | Proximal tibia | - | Intralesional | Curettage + cement | - | - | + | - | 90 |
| 13 | M | Proximal tibia | - | Intralesional | Curettage + cement | - | - | + | + | 13 |
| 19 | F | Distal femur | - | Radical | Amputation | + | - | - | - | 74 |
| 33 | F | Proximal tibia | - | Radical | Amputation | + | - | - | - | 111 |
| 16 | M | Proximal tibia | - | Radical | Amputation | + | - | - | + | 20 |
| 15 | F | Proximal tibia | - | Radical | Amputation | + |  | - | - | 114 |
| 32 | M | Proximal tibia | + | NR | NR | NR | NR | NR | NR | 5 |
| ***Vijayan 2015 [31]*** | 1 | 19 | F | Cuneiform |  | Intralesional | Curettage + cement filling | + | - | - | - | 36 |
| ***Chow 2016 [32]*** | 8 | 16 | M | Proximal tibia | - | Radical | Amputation | + | - | - | - | 110 |
| 26 | F | Distal femur | - | Radical | Amputation | + | - | NR | + | 14 |
| 12 | M | Proximal fibula | - | Radical | Disarticulation | + | - | + | + | 21 |
| 33 | F | Distal femur | + | Wide | NR | - | - | - | - | 48 |
| 15 | F | Proximal tibia | + | Wide | NR | - | - | - | - | 38 |
| 31 | F | Metatarsal | + | Radical | Ray amputation | + | - | - | + | 30 |
| 11 | M | Metatarsal | + | Wide | NR | - | - | - | - | 21 |
| 15 | M | Distal femur | + | Wide | NR | - | - | - | - | 12 |
| ***Chobpenthai 2019 [33]*** | 1 | 11 | F | Patella | + | Wide | Rotational flap | - | - | - | - | 13 |
| ***Cahayadi 2019 [34]*** | 1 | 46 | M | Proximal ulna | NR | Wide | Arthroplasty | NR | NR | NR | NR | NR |
| ***Current report 2022*** | **1** | **12** | **M** | **Cervical spine** | **+** | **Intralesional** | **Reconstruction + allograft** | **+** | **+** | **-** | **-** | **36** |
| *F = Female; M = Male; NA ChT = Neoadjuvant Chemotherapy; ChT = Chemotherapy; RT = Radiotherapy; OS = Osteosarcoma; GCRO = Giant Cell-Rich Osteosarcoma; NR = Not registered.* | | | | | | | | | | | | |
