# Supplementary material for: Case Report: Giant cell-rich osteosarcoma of the cervical spine in the pediatric age. A rare entity to consider
Source: Frontiers journal article supplement (doi:10.3389/fsurg.2022.1001149), 2022-10-14
Supplement: Table_2.DOCX [file Table_2.DOCX]

| ***Table II.*** *Summary of the cases of cervical spine osteosarcoma reported in the literature* | | | | | | | | | | | | | | |
| --- | --- | --- | --- | --- | --- | --- | --- | --- | --- | --- | --- | --- | --- | --- |
| **Study** | **N** | **Age (y)** | **Sex** | **Cervical spine location** | **NA ChT** | **Resection** | **Approach** | **Reconstruction** | **Pathology** | **ChT** | **RT** | **Local recurrence** | **Metastases** | **Follow-up (months)** |
| ***Gandolfi 1984 [35]*** | 1 | 39 | F | C6 | NR | Intralesional | Anterior | Interbody fusion with autograft | Chondroblastic OS | + | + | NR | NR | NR |
| ***Ozaki 2001 [36]*** | 1 | 5 | F | C4 | + | Intralesional | Anterior | Anterior fusion + bone graft | Telangiectasic OS | + | + | - | - | 26 |
| ***Ponnampalam 2012 [37]*** | 1 | 62 | F | C2-C4 | + | Intralesional | NOT | NOT | Osteoblastic OS | NR | + | NR | NR | NR |
| ***Turel 2012 [38]*** | 1 | 15 | M | C5 | - | Intralesional | Combined | Posterior fusion + auto/allograft | Telangiectasic OS | + | + | NR | - | 12 |
| ***Feng 2013 [39]*** | 6 | 22 | F | C1 | + | Intralesional | Combined | Occipitocervical fusion with bone graft + internal fixation | NR | + | - | + | + | 44 |
| 41 | M | C2-C3 | + | Intralesional | Combined | NR | + | - | + | + | 75 |
| 58 | M | C3 | + | Intralesional | Combined | Titanium mesh filled with bone cement ± posterior internal fixation with pedicle screws. | NR | + | + | - | + | 39 |
| 50 | M | C6 | - | Intralesional | Anterior | NR | + | + | + | + | 50 |
| 27 | M | C7 | + | Intralesional | Combined | NR | + | + | - | - | 53 |
| 40 | F | C7 | + | Intralesional | Combined | NR | + | + | - | - | 36 |
| ***Zils 2013 [40]*** | 2 | 5 | F | C4 | `- | Intralesional | NR | NR | Telangiectasic OS | + | + | - | - | 168 |
| 11 | M | C7-T2 | - | Intralesional | NR | NR | Osteoblastic OS | + | + | - | - | 86,2 |
| ***Clarke 2016 [41]*** | 1 | 8 | F | C1 | + | Marginal | Combined | Occipitocervical fusion+ graft | Giant cell OS | + | - | - | - | 16 |
| ***Current report 2022*** | 1 | 12 | M | C7 | + | Intralesional | Combined | Anterior fusion with titanium mesh, bone graft & anterior plate + Posterior fixation | GRCO | + | + | - | - | 36 |
| *F = Female; M = Male; y = years; OS = Osteosarcoma; NA ChT = Neoadjuvant Chemotherapy; ChT = Chemotherapy; RT = Radiotherapy; GCRO = Giant Cell Rich Osteosarcoma; NOT = Non-operative Treatment; NR = Not registered.* | | | | | | | | | | | | | | |
